# Supplementary material for: Dopamine regulates endothelial progenitor cell mobilization from mouse bone marrow in tumor vascularization
Source: JCI journal article supplement (doi:10.1172/jci33125), 2008-03-12
Supplement: sd1 [file 1]

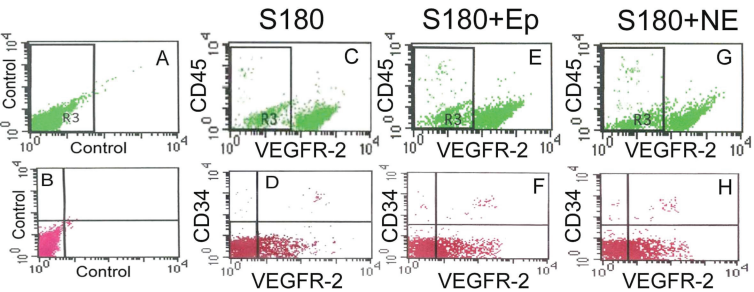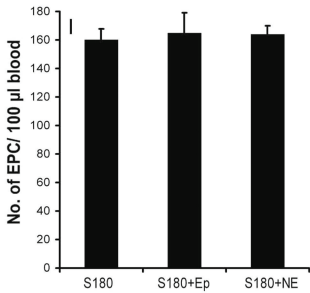

### Supplementary Figure 1

Treatment with Epinephrine (Ep) and Norepinephrine (NE) had no effect on tumor induced mobilization of EPC into peripheral circulation. (A and B) are the respective isotype controls. (C-I) EPC frequency was flow cytometrically analyzed on post transplantation day 6 in the various experimental groups. (C, E and G) shows the gate used to select the total CD45<sup>-</sup> population. (D, F and H) are the corresponding flow cytometric analysis for detecting CD34<sup>+</sup>VEGFR-2<sup>+</sup> cells among the gated CD45<sup>-</sup> cell population. The cells in the upper right quadrant are the desired EPC population showing a phenotype of CD45<sup>-</sup>CD34<sup>+</sup>VEGFR-2<sup>+</sup> cells. (I) shows absolute value of EPC in the various groups. Figures are representative of four separate experiments for each group.
